# Supplementary material for: Topics Mentioned by Stroke Patients during Supportive Phone Calls—Implications for Individualized Aftercare Programs
Source: MDPI journal article supplement (doi:10.3390/healthcare10122394), 2022-11-29
Supplement: s1 [file s1]

## Supplements

Table S1. Conversation topics mentioned by all patients during phone call. Topics are ordered by descending number of occurrence.

| Count | Topic                   | %    |
|-------|-------------------------|------|
| 106   | rehabilitation          | 67.5 |
| 49    | specialist physician    | 31.2 |
| 42    | symptoms                | 26.8 |
| 33    | medication              | 21.0 |
| 31    | outpatient care         | 19.7 |
| 31    | therapy                 | 19.7 |
| 29    | aids and appliances     | 18.5 |
| 29    | blood pressure          | 18.5 |
| 26    | driving license         | 16.6 |
| 26    | occupation              | 16.6 |
| 21    | disability              | 13.4 |
| 19    | home environment        | 12.1 |
| 17    | general practitioner    | 10.8 |
| 15    | risk factors            | 9.6  |
| 12    | sports                  | 7.6  |
| 7     | other medical condition | 4.5  |
| 6     | physiotherapy           | 3.8  |
| 6     | speech therapy          | 3.8  |
| 5     | nutrition               | 3.2  |
| 4     | depression              | 2.5  |
| 4     | finances                | 2.5  |
| 4     | health insurance        | 2.5  |
| 4     | smoking                 | 2.5  |
| 3     | corona virus            | 1.9  |
| 3     | exercise                | 1.9  |
| 3     | patent foramen oval     | 1.9  |
| 2     | alcohol                 | 1.3  |
| 2     | body weight             | 1.3  |

|   |                         |     |
|---|-------------------------|-----|
| 2 | daily routine           | 1.3 |
| 2 | diabetes                | 1.3 |
| 2 | electrocardiogramm      | 1.3 |
| 2 | leisure time            | 1.3 |
| 2 | life style              | 1.3 |
| 2 | medical care            | 1.3 |
| 2 | relatives / care takers | 1.3 |
| 2 | sleep                   | 1.3 |
| 1 | anxiety                 | 0.6 |
| 1 | atrial fibrillation     | 0.6 |
| 1 | concentration           | 0.6 |
| 1 | disease awareness       | 0.6 |
| 1 | fatigue                 | 0.6 |
| 1 | hospitalisation         | 0.6 |
| 1 | memory                  | 0.6 |
| 1 | mobility                | 0.6 |
| 1 | occupational therapy    | 0.6 |
| 1 | personal performance    | 0.6 |
| 1 | psychotherapy           | 0.6 |
| 1 | self-help group         | 0.6 |
| 1 | sleep apnea             | 0.6 |

Table S2. Adjusted odds ratios for mentioning specific topics.

|                             | female sex           | age                 | NIHSS admission     | no. secondary diagnoses | no. risk factors    | days in hospital    | NIHSS discharge     | mRS discharge        | no. meds discharge  | no rehabilitation    | inpatient rehabilitation | multi-person household |
|-----------------------------|----------------------|---------------------|---------------------|-------------------------|---------------------|---------------------|---------------------|----------------------|---------------------|----------------------|--------------------------|------------------------|
| <b>rehabilitation</b>       | 1.34<br>(0.59-3.12)  | 0.99<br>(0.95-1.02) | 1.05<br>(0.93-1.20) | 1.22<br>(1.00-1.51)     | 0.93<br>(0.76-1.24) | 0.98<br>(0.91-1.06) | 1.12<br>(0.86-1.48) | 0.57<br>(0.33-0.96)  | 0.94<br>(0.80-1.10) | 0.78<br>(0.23-2.72)  | 1.68<br>(0.63-4.55)      | 0.97<br>(0.36-2.49)    |
| <b>specialist physician</b> | 0.55<br>(0.23-1.29)  | 1.00<br>(0.97-1.04) | 1.07<br>(0.96-1.20) | 1.11<br>(0.94-1.33)     | 1.24<br>(0.95-1.65) | 0.97<br>(0.88-1.05) | 0.73<br>(0.52-0.98) | 1.16<br>(0.69-1.97)  | 0.99<br>(0.84-1.15) | 1.85<br>(0.48-6.90)  | 1.11<br>(0.40-3.12)      | 2.64<br>(0.93-8.53)    |
| <b>symptoms</b>             | 1.50<br>(0.61-3.69)  | 0.96<br>(0.93-1.00) | 1.08<br>(0.97-1.20) | 0.97<br>(0.78-1.17)     | 1.45<br>(1.10-1.98) | 0.99<br>(0.90-1.07) | 1.09<br>(0.82-1.43) | 0.41<br>(0.22-0.72)  | 1.09<br>(0.92-1.30) | 0.66<br>(0.09-3.19)  | 1.24<br>(0.45-3.54)      | 1.05<br>(0.37-3.14)    |
| <b>medication</b>           | 0.34<br>(0.11-0.91)  | 1.02<br>(0.98-1.06) | 0.98<br>(0.84-1.12) | 1.09<br>(0.90-1.32)     | 1.21<br>(0.90-1.65) | 1.00<br>(0.90-1.08) | 0.66<br>(0.43-0.97) | 1.31<br>(0.73-2.39)  | 0.95<br>(0.78-1.12) | 2.06<br>(0.51-8.20)  | 0.75<br>(0.23-2.46)      | 1.01<br>(0.33-3.30)    |
| <b>outpatient care</b>      | 5.98<br>(1.80-23.52) | 1.09<br>(1.03-1.17) | 1.00<br>(0.84-1.17) | 0.99<br>(0.81-1.21)     | 1.15<br>(0.78-1.69) | 1.14<br>(1.01-1.28) | 1.31<br>(0.88-2.06) | 1.68<br>(0.72-4.20)  | 1.22<br>(0.99-1.53) | 1.24<br>(0.11-1.27)  | 1.40<br>(0.23-1.04)      | 0.93<br>(0.25-3.60)    |
| <b>therapy</b>              | 0.60<br>(0.22-1.50)  | 1.02<br>(0.98-1.06) | 1.08<br>(0.96-1.21) | 0.98<br>(0.80-1.17)     | 1.06<br>(0.79-1.42) | 0.97<br>(0.87-1.06) | 1.16<br>(0.89-1.53) | 0.70<br>(0.39-1.23)  | 0.89<br>(0.73-1.06) | 2.17<br>(0.46-9.41)  | 1.72<br>(0.57-5.48)      | 1.02<br>(0.36-3.07)    |
| <b>aids and appliances</b>  | 2.30<br>(0.80-6.81)  | 1.07<br>(1.02-1.14) | 1.05<br>(0.89-1.22) | 0.84<br>(0.64-1.04)     | 1.08<br>(0.73-1.57) | 1.01<br>(0.88-1.13) | 0.69<br>(0.47-0.96) | 5.35<br>(2.34-14.65) | 1.21<br>(1.01-1.47) | 0.71<br>(0.10-4.20)  | 0.57<br>(0.12-2.68)      | 1.56<br>(0.45-5.95)    |
| <b>blood pressure</b>       | 1.36<br>(0.51-3.60)  | 1.00<br>(0.97-1.05) | 0.85<br>(0.69-0.99) | 0.86<br>(0.68-1.07)     | 1.50<br>(1.10-2.13) | 1.01<br>(0.92-1.10) | 1.07<br>(0.74-1.51) | 1.03<br>(0.57-1.89)  | 0.98<br>(0.81-1.16) | 1.32<br>(0.24-6.09)  | 2.25<br>(0.75-7.25)      | 4.71<br>(1.30-23.30)   |
| <b>driving license</b>      | 0.40<br>(0.11-1.28)  | 1.00<br>(0.96-1.04) | 1.02<br>(0.88-1.17) | 0.71<br>(0.53-0.93)     | 1.40<br>(0.97-2.04) | 1.06<br>(0.97-1.16) | 0.53<br>(0.31-0.81) | 2.92<br>(1.48-6.21)  | 0.97<br>(0.77-1.18) | 2.61<br>(0.55-12.35) | 1.48<br>(0.41-5.58)      | 2.48<br>(0.64-12.72)   |
| <b>occupation</b>           | 0.62<br>(0.16-2.07)  | 0.89<br>(0.83-0.94) | 1.04<br>(0.89-1.19) | 0.98<br>(0.66-1.38)     | 1.22<br>(0.77-1.89) | 0.95<br>(0.83-1.05) | 0.93<br>(0.61-1.37) | 1.03<br>(0.49-2.21)  | 0.75<br>(0.54-1.00) | 0.91<br>(0.10-6.15)  | 1.10<br>(0.30-4.12)      | 0.93<br>(0.21-4.58)    |
| <b>disability</b>           | 1.23<br>(0.35-4.20)  | 1.02<br>(0.97-1.08) | 1.01<br>(0.85-1.17) | 0.80<br>(0.57-1.04)     | 0.93<br>(0.56-1.46) | 0.98<br>(0.84-1.09) | 1.08<br>(0.78-1.56) | 3.04<br>(1.32-1.16)  | 0.99<br>(0.78-1.23) | 0.00                 | 1.13<br>(0.26-5.09)      | 3.66<br>(0.80-2.31)    |
| <b>home environment</b>     | 1.91<br>(0.58-6.47)  | 1.09<br>(1.02-1.17) | 1.18<br>(1.00-1.39) | 1.03<br>(0.82-1.27)     | 0.75<br>(0.46-1.12) | 0.93<br>(0.78-1.07) | 0.94<br>(0.67-1.29) | 1.95<br>(0.86-4.76)  | 1.05<br>(0.81-1.32) | 0.19<br>(0.01-1.76)  | 0.25<br>(0.04-1.37)      | 0.39<br>(0.10-1.48)    |
| <b>general practitioner</b> | 0.71<br>(0.17-2.59)  | 0.99<br>(0.94-1.04) | 1.02<br>(0.85-1.17) | 0.95<br>(0.67-1.26)     | 0.73<br>(0.40-1.20) | 0.96<br>(0.82-1.07) | 1.26<br>(0.86-1.82) | 0.57<br>(0.24-1.23)  | 0.99<br>(0.74-1.25) | 0.00                 | 1.51<br>(0.37-6.70)      | 1.85<br>(0.40-13.39)   |
| <b>risk factors</b>         | 1.69<br>(0.51-5.64)  | 0.96<br>(0.91-1.01) | 0.85<br>(0.61-1.06) | 1.06<br>(0.77-1.40)     | 1.11<br>(0.72-1.67) | 0.93<br>(0.78-1.06) | 0.81<br>(0.45-1.33) | 1.93<br>(0.87-4.67)  | 1.01<br>(0.78-1.29) | 0.70<br>(0.08-4.67)  | 0.70<br>(0.14-3.29)      | 0.82<br>(0.20-3.75)    |

Statistical relationship between clinical and socio-demographic variables during the hospital stay and mentioned topics two months after the event. Table shows adjusted odds ratios (aOR) with 95%-confidence interval calculated by a multivariate logistic regression model with conversation topic as a dependent variable (rows) and clinical and socio-demographic factors as explaining variables (columns). Cells with significant aORs are highlighted.
